# Supplementary material for: Totally atom-economical synthesis of nano/micro structured nickel hydroxide realized by an Ni–O2 fuel cell
Source: Royal Society of Chemistry journal article supplement (doi:10.1039/c4gc02554g), 2015-01-01
Supplement: c4gc02554g1.pdf [file c4gc02554g1.pdf]

## Supplementary Information

### Totally Atom-Economical Synthesis of Nano/Micro-Structured Nickel

#### Hydroxide Realized by an Ni–O<sub>2</sub> Fuel Cell

Junqing Pan<sup>1,4\*</sup>, Meng Yang<sup>1</sup>, Yanzhi Sun<sup>2,4</sup>, Ting Ma<sup>1</sup>, Xihong Yue<sup>1</sup>, Wei Li<sup>3\*</sup>, Xueliang Sun<sup>4</sup>

<sup>1</sup>State Key Laboratory of Chemical Resource Engineering, Beijing University of Chemical Technology, Beijing 100029, China

<sup>2</sup>National Fundamental Research Laboratory of New Hazardous Chemicals Assessment and Accident Analysis, Beijing University of Chemical Technology, Beijing 100029, China

<sup>3</sup>Department of Engineering Technology and Texas Center for Superconductivity, The University of Houston, Houston, TX 77204, USA

<sup>4</sup>Department of Mechanical and Materials Engineering, University of Western Ontario, London, ON, N6A 5B9, Canada.

\*Correspondence to: [jqpan@mail.buct.edu.cn](mailto:jqpan@mail.buct.edu.cn); [wli23@central.uh.edu](mailto:wli23@central.uh.edu)

## 1. Calculation for atom economy

### (1) The conventional process

Atom economy is defined as a measure of the proportion of reactant atoms which are incorporated into the desired product of a chemical reaction. It can be calculated by the equation below.<sup>[1]</sup>

Atom economy = (mass or molecular weight of the desired product(s) ÷ mass or molecular weight of all reactants) × 100%

The calculation for atom economies of the reactions in Schematic 1a is as follows.

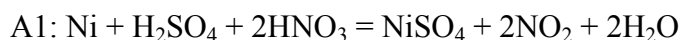

Atom economy = molecular weight of NiSO<sub>4</sub> ÷ (molecular weight of Ni + molecular weight of H<sub>2</sub>SO<sub>4</sub> + 2 × molecular weight of HNO<sub>3</sub>) × 100% = (58.7 + 32.1 + 16 × 4) ÷ (58.7 + (2 + 32.1 + 16 × 4) + 2 × (1 + 14 + 3 × 16)) × 100% = 154.8 ÷ 282.8 × 100% = 54.7%

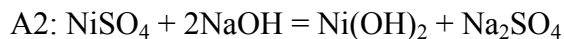

Atom economy = molecular weight of Ni(OH)<sub>2</sub> ÷ (molecular weight of NiSO<sub>4</sub> + 2 × molecular weight of NaOH) × 100% = (58.7 + 17 × 2) ÷ (58.7 + 32.1 + 16 × 4 + 2 × (23 + 17)) × 100% = 92.7 ÷ 234.8 × 100% = 39.5%

Atom economy of the route = 54.7% × 39.5% = 21.6%

### (2) The proposed process by a nickel–oxygen (Ni–O<sub>2</sub>) fuel cell

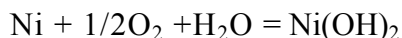

Atom economy of the route = molecular weight of Ni(OH)<sub>2</sub> ÷ (molecular weight of Ni + 1/2 × molecular weight of O<sub>2</sub> + molecular weight of H<sub>2</sub>O) × 100% = (58.7 + 17 × 2) ÷ (58.7 + 1/2 × 16 × 2 + 18) × 100% = 92.7 ÷ 92.7 × 100% = 100%

## Supplementary Figures

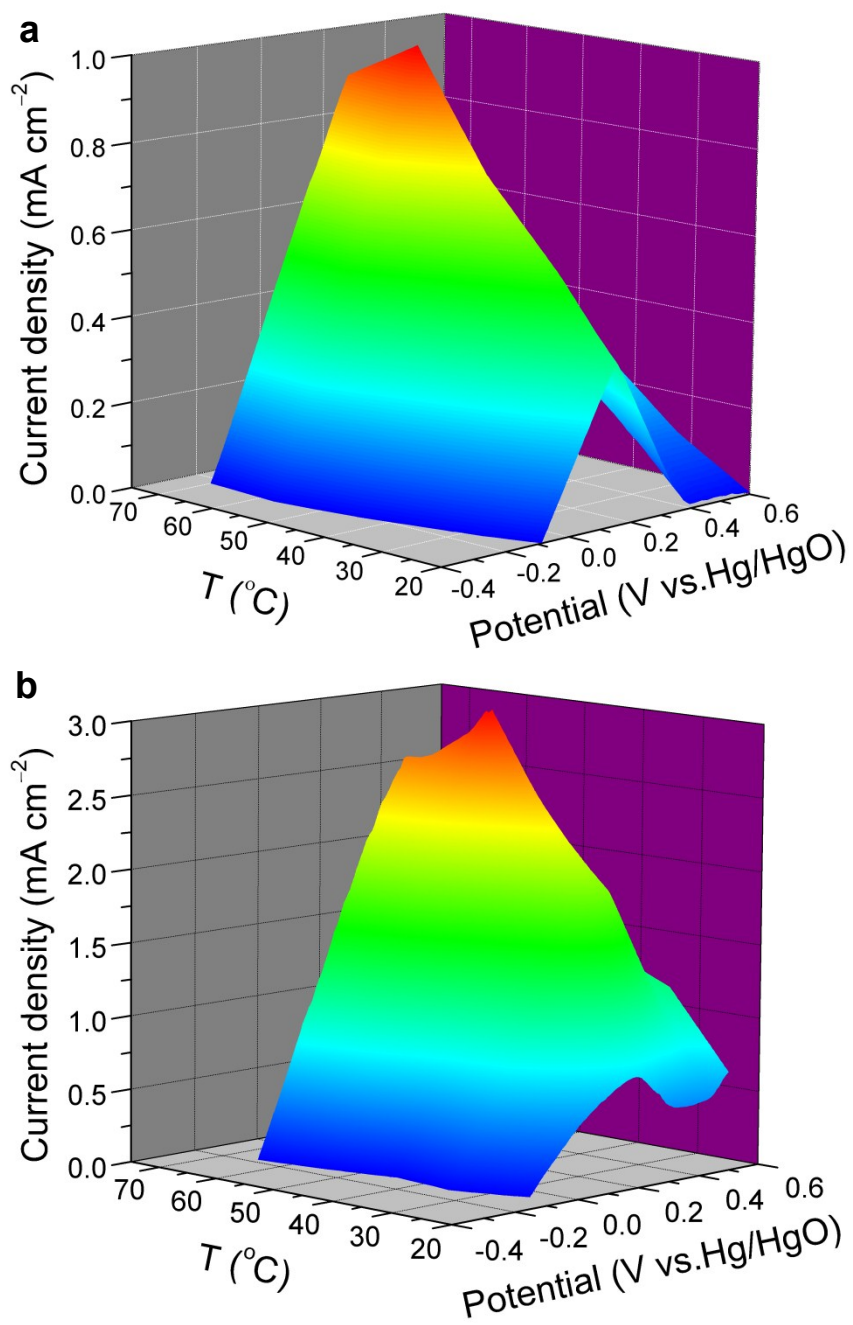

**Fig. S1** Anodic polarization curves of (a) an Ni plate anode and (b) an Ni foam anode against temperature. An Ni anode, an Ni wire, and an Hg/HgO electrode were, respectively, used as the working electrode, the counter electrode, and the reference electrode. The electrolyte was a

mixture of  $0.50 \text{ mol L}^{-1} \text{ Na}_2\text{SO}_4$  and  $1.0 \text{ mol L}^{-1} \text{ NH}_3 \cdot \text{H}_2\text{O}$ . Its pH was adjusted by NaOH in the range of 11.30–11.50. The potential scanning rate was  $2 \text{ mV s}^{-1}$  in the range of  $-0.3$  to  $0.6 \text{ V}$ .

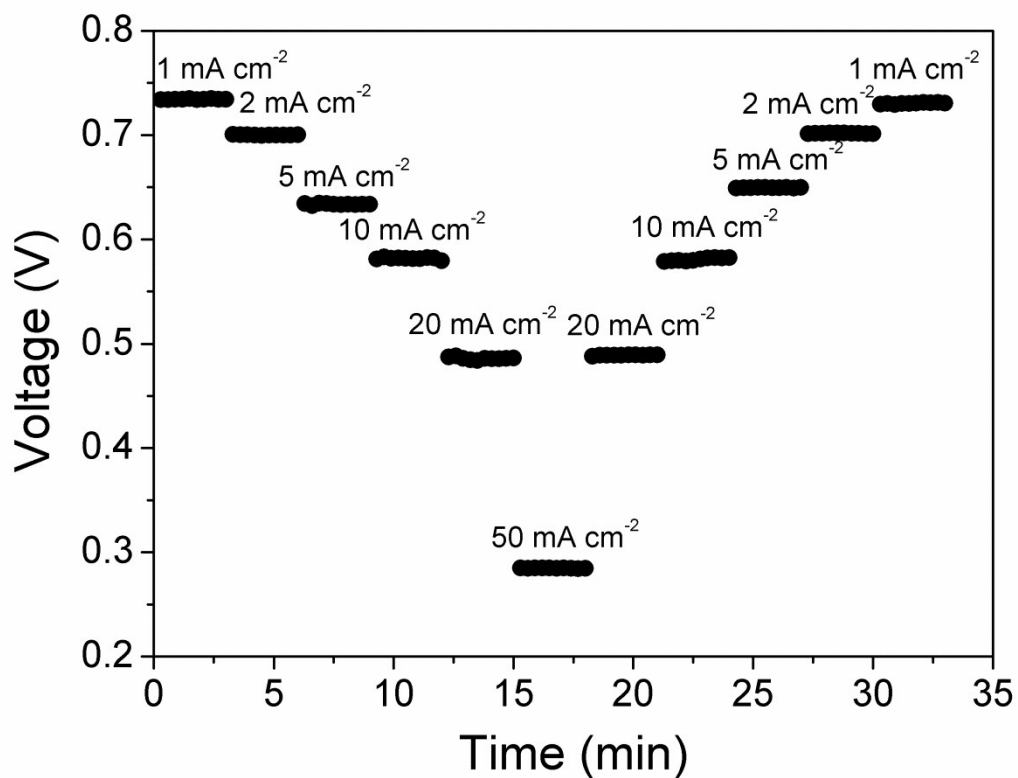

**Fig. S2** Stability testing of the Ni–O<sub>2</sub> fuel cell with an Ni foam anode. The fuel cell operated galvanostatically in an aqueous electrolyte of  $0.50 \text{ mol L}^{-1} \text{ Na}_2\text{SO}_4$ ,  $2.0 \text{ mol L}^{-1} \text{ NH}_3 \cdot \text{H}_2\text{O}$ , and  $0.60 \text{ mol L}^{-1} \text{ NaCl}$  at  $55 \text{ }^\circ\text{C}$ .

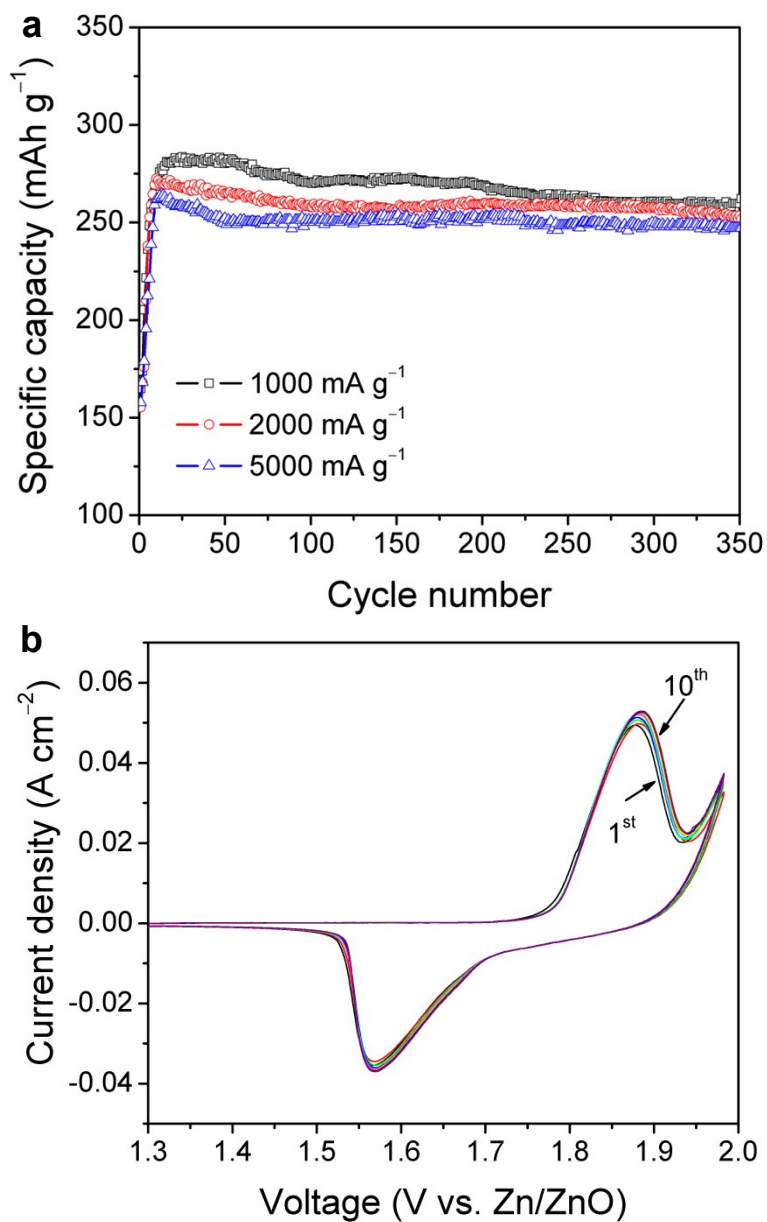

**Fig. S3** (a) Cycle curves at three different discharge current densities and (b) first 10 cycles of the cyclic voltammograms of the synthesized nano/micro structured  $\beta$ -Ni(OH)<sub>2</sub> samples at potential scanning rate of 1 mV S<sup>-1</sup>. The experiments were carried out with a three-electrode configuration ( $\beta$ -Ni(OH)<sub>2</sub> working electrode, Zn/ZnO reference electrode, and Ni wire counter electrode) in a 6.0 mol L<sup>-1</sup> KOH aqueous solution.

**References:**

- [1] B. Trost, *Science* 1991, 254, 1471-1477.
